# Supplementary material
Source: publisher figshare collection journal article supplement (https://acs.figshare.com/ndownloader/files/4107430)
Supplement: Supplementary file 1 [file 4107430]

## Supporting information

**Table S1.** Recoveries of Bevacizumab in 100  $\mu$ L vitreous humor over the range of 1.95 -

250  $\mu$ g.

| Amount ( $\mu$ g) | Recovery in each batch (%) (Mean $\pm$ SD) (N=4) |                 |                 |                 | Recovery of all batches (%) |
|-------------------|--------------------------------------------------|-----------------|-----------------|-----------------|-----------------------------|
|                   | Batch 1                                          | Batch 2         | Batch 3         | Batch 4         | Overall                     |
| 250.00            | 101.7 $\pm$ 2.3                                  | 102.5 $\pm$ 0.5 | 103.0 $\pm$ 5.2 | 102.4 $\pm$ 5.1 | 102.4 $\pm$ 3.4             |
| 125.00            | 97.4 $\pm$ 2.0                                   | 99.6 $\pm$ 1.0  | 101.0 $\pm$ 2.5 | 101.0 $\pm$ 4.2 | 99.7 $\pm$ 2.8              |
| 62.50             | 97.3 $\pm$ 3.2                                   | 94.4 $\pm$ 0.5  | 95.7 $\pm$ 2.0  | 95.1 $\pm$ 0.8  | 95.6 $\pm$ 2.1              |
| 31.25             | 98.6 $\pm$ 1.3                                   | 100.2 $\pm$ 0.4 | 99.8 $\pm$ 0.5  | 101.8 $\pm$ 0.7 | 100.1 $\pm$ 1.4             |
| 15.63             | 96.0 $\pm$ 5.8                                   | 96.4 $\pm$ 4.1  | 94.1 $\pm$ 3.2  | 96.5 $\pm$ 5.8  | 95.7 $\pm$ 4.5              |
| 7.81              | 101.3 $\pm$ 2.9                                  | 102.4 $\pm$ 3.9 | 103.7 $\pm$ 3.0 | 103.1 $\pm$ 2.8 | 102.6 $\pm$ 3.0             |
| 3.91              | 100.6 $\pm$ 3.0                                  | 99.6 $\pm$ 3.8  | 102.1 $\pm$ 1.8 | 101.1 $\pm$ 5.9 | 100.9 $\pm$ 3.6             |
| 1.95              | 108.8 $\pm$ 5.4                                  | 108.5 $\pm$ 6.3 | 111.3 $\pm$ 5.4 | 109.8 $\pm$ 5.7 | 109.6 $\pm$ 5.2             |

**Table S2.** Percentage of initial amount of spiked Bevacizumab in vitreous humor (ex vivo)

after incubated from 0 to 28 days at 37 °C.

| Day     | Percentage of Initial amount (mean ± SD)<br>(N=4) |
|---------|---------------------------------------------------|
| 4 hours | 86.7 ± 5.2                                        |
| 7       | 43.6 ± 4.0                                        |
| 14      | 34.2 ± 0.4                                        |
| 21      | 34.9 ± 3.2                                        |
| 28      | 35.8 ± 1.1                                        |

**Table S3.** Pharmacokinetics of Bevacizumab in vitreous humor after intravitreal injected

1.25 mg Bevacizumab into eyes of rabbits. The pharmacokinetics followed first order

kinetics model.

| Day | Mean±SD % (n=6) |
|-----|-----------------|
| 1   | 706.8.6±133.3   |
| 7   | 247.5±206.      |
| 21  | 58.5±10.0       |

$$\lambda (\text{day}^{-1}) = 0.1221$$

$$t_{1/2} (\text{days}) = 5.7$$
